# Supplementary figures and images for: Hawkmoths evaluate scenting flowers with the tip of their proboscis
Source: eLife journal article supplement (doi:10.7554/elife.15039), 2016-05-05

**A**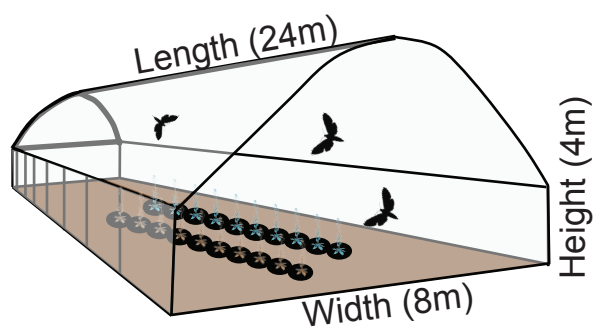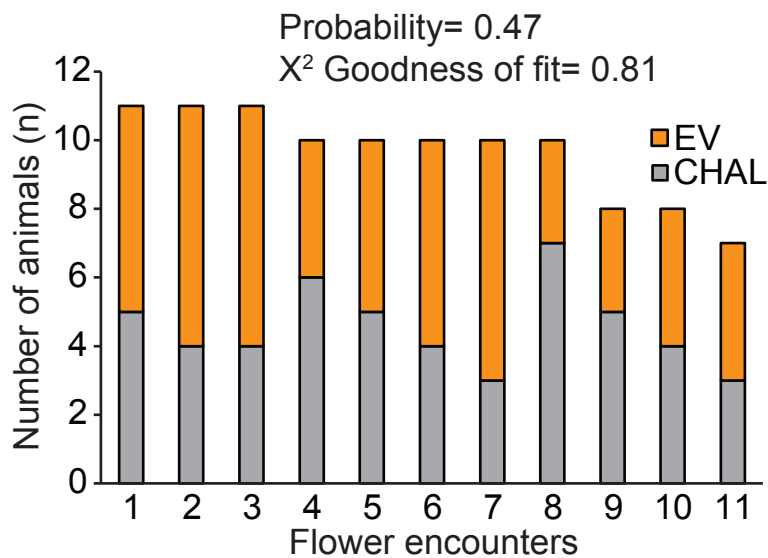**B**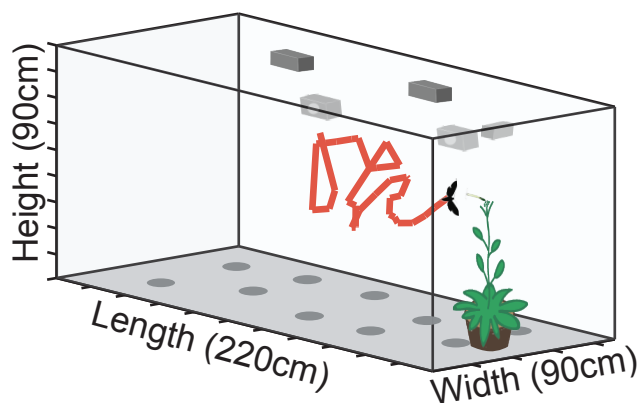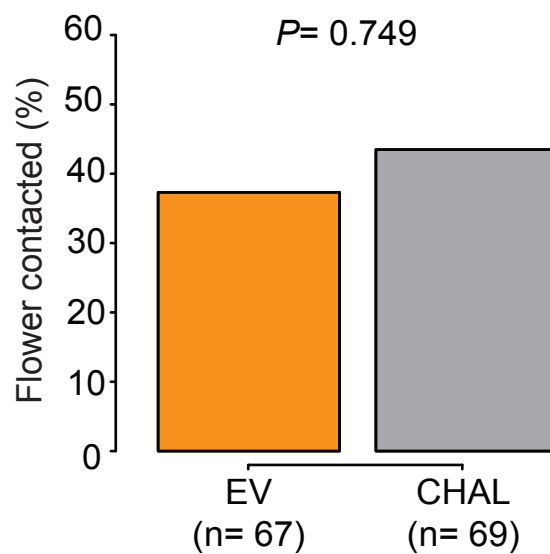**C**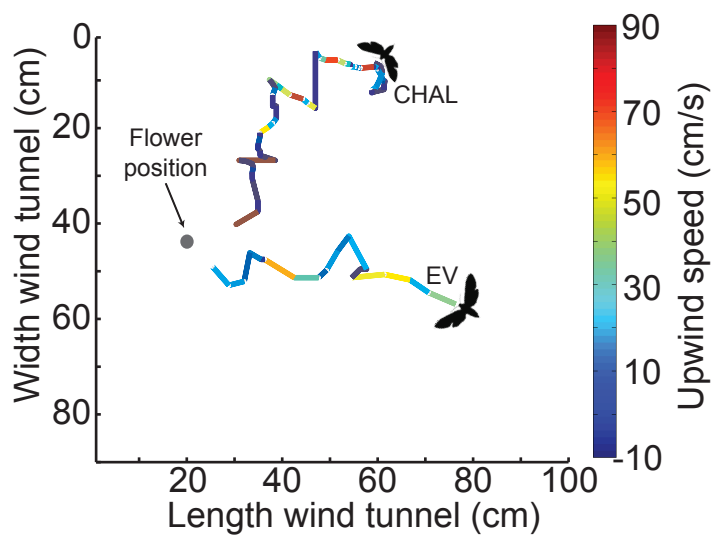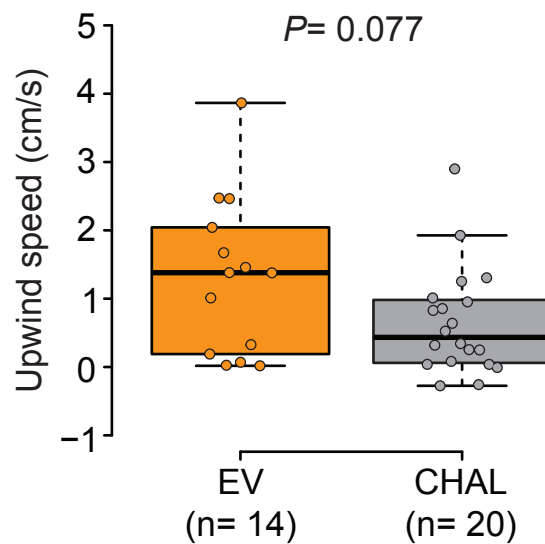

Supplement: supp [file elife-15039-supp-v1.zip]

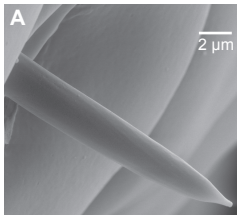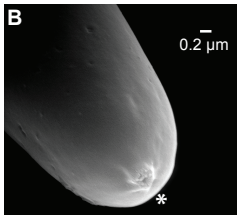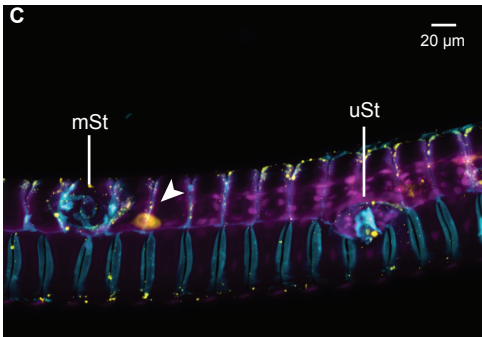

Supplement: supp [file elife-15039-supp-v1.zip]

**A**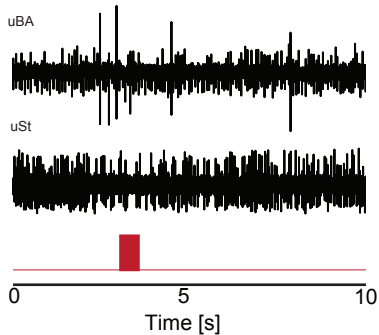**B**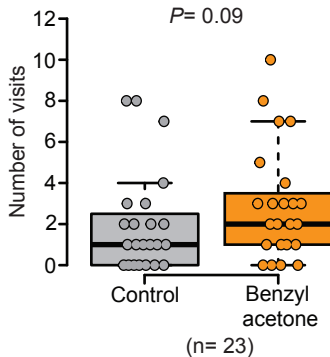

Supplement: supp [file elife-15039-supp-v1.zip]

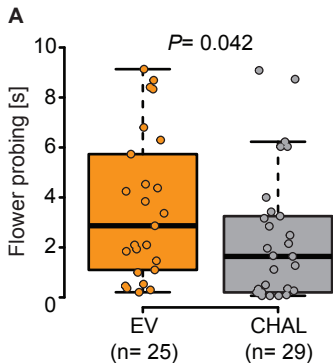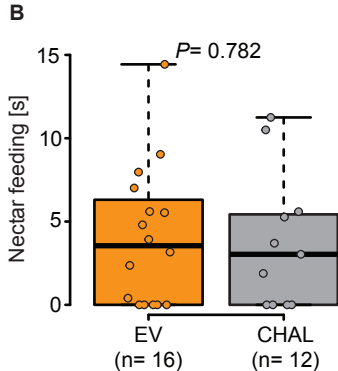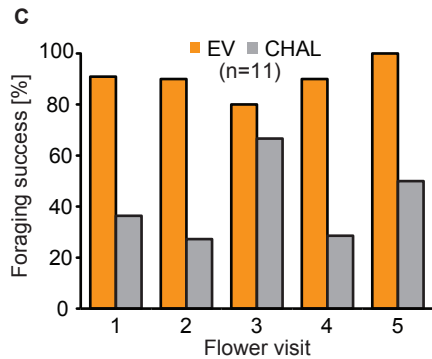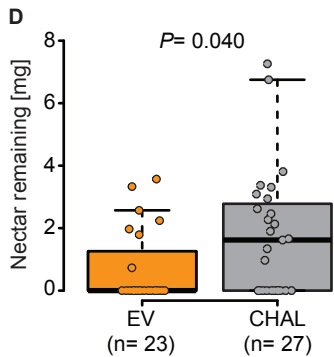

Supplement: supp [file elife-15039-supp-v1.zip]
